# Supplementary material for: Enhancing oxygen reduction activity of dinuclear copper complexes loaded on an N-doped carbon support via a low-temperature pyrolysis strategy
Source: Royal Society of Chemistry journal article supplement (doi:10.1039/d4dt01044b), 2024-01-01
Supplement: d4dt01044b1.pdf [file d4dt01044b1.pdf]

## ***Supporting Information***

### **Enhancing oxygen reduction activity of dinuclear copper complexes loaded on N-doped carbon support via low-temperature pyrolysis strategy**

Hua-Min Chi, Kun-Zu Yang, Peng-Peng Guo, Ying Xu, Chao Xu, Yong-Zhi Su, Xin Liu and Jin-Gang Liu\*

School of Chemistry & Molecular Engineering, East China University of Science and Technology, 130 Meilong Road, Shanghai, 200237, P. R. China

\*Corresponding Author: Jin-Gang Liu, Professor

E-mail: liujingang@ecust.edu.cn

## **Experimental**

### **Chemicals and Materials.**

All reaction reagents and chemicals were obtained and used without further purification. High-purity water ( $\geq 18.25 \text{ M}\Omega \cdot \text{cm}$ ) and acetonitrile was used to prepare the solutions. Carbon black (Black Pearls 2000) was purchased from Cabot Corporation. 3,6-di-2-pyridine-1,2,4,5-tetraazine (DPTZ) was prepared according to the reported literature.<sup>S1</sup>

### **Characterizations**

The FTIR spectra were recorded on a Shimadzu Fourier transform infrared spectrometer (IR Prestige-21). UV-vis diffuse reflectance spectra were recorded on a Shimadzu UV-vis spectrophotometer (UV-2600). Transmission electron microscopy (TEM) characterization was performed using Thermo Fisher Talos F200X (FETEM, 200 kV). High angle annular dark field (HAADF-STEM) images were recorded using a convergence semi angle of 11 mrad, and inner- and outer collection angles of 59 and 200 mrad, respectively. X-ray Diffraction (XRD) patterns were recorded on an X-ray powder diffractometer (D/max2550 V, Rigaku Japan). X-ray photoelectron spectroscopy (XPS) was conducted on a Thermo Scientific<sup>TM</sup> K-Alpha<sup>TM+</sup> spectrometer equipped with a monochromatic Al K $\alpha$  X-ray source ( $h\nu = 1486.6 \text{ eV}$ ) operating at 100 W. All binding energies were corrected for reference to the C1s peak (284.8 eV) corresponding to the adventitious carbon. N<sub>2</sub> adsorption-desorption data were

recorded at liquid nitrogen temperature (77 K) on a Micromeritics ASAP 2460 apparatus. The Brunauer-Emmett-Teller (BET) method was used to calculate the catalyst surface areas. Raman spectra were recorded using a Renishaw 2000 instrument with a 532 nm excitation wavelength. The elemental contents of the catalysts were measured by ICP OES (Perkin Elmer Ltd., USA).

## **Materials Synthesis**

### **Preparation of CNB**

1.0 g of carbon black and 2.0 g of melamine were physically mixed by grinding, placed in a quartz tube, and pyrolyzed at 900 °C in nitrogen atmosphere for 60 min at a heating rate of 5 °C min<sup>-1</sup>. After cooling to room temperature the samples was collected and donated at CNB.

### **Preparation of Cu-BPOZ@CNB**

50 mg CNB and 236 mg DPTZ were mixed in 10 mL acetonitrile under sonication for 30 min to form solution A. In addition, 500 mg of CuSO<sub>4</sub>·5H<sub>2</sub>O was dissolved in 30 mL water to form solution B. Solution A was added into solution B rapidly in a flask. The above mixed solution was reacted with constant stirring at 55 °C for 12 h, during which process the DPTZ ligand hydrolyzed and converted into the BPOZ ligand with the assistance of Cu<sup>2+</sup>.S2After cooling, the resultant composite was collected by a centrifugation process and washed with acetonitrile and water, and dried under vacuum overnight at 60 °C. The as-prepared samples were donated at Cu-BPOZ@CNB.

### **Preparation of Cu-BPOZ@CNB-T**

The composite of Cu-BPOZ@CNB was placed into a quartz tube, followed by pyrolysis under N<sub>2</sub> atmosphere at a designated temperature for 60 min at a heating rate of 5 °C min<sup>-1</sup>. The as-prepared samples were donated at Cu-BPOZ@CNB-T, where T represents the carbonization temperature (300-450 °C).

### **Preparation of Cu-BPOZ@CNB-800**

The composite of Cu-BPOZ@CNB was placed into a quartz tube, followed by pyrolysis under N<sub>2</sub> atmosphere at 800 °C for 60 min at a heating rate of 5 °C min<sup>-1</sup>. After cooling to room temperature,

the pyrolyzed sample was etched by 1 M HCl solution at 80 °C for 10 h to remove the nanoparticles. Finally, the resultant composite was centrifuged and washed with water and ethanol, and dried under vacuum overnight at 60 °C. The as-prepared samples were donated at Cu-BPOZ@CNB-800.

### Preparation of Cu-Phen@CNB-400

The composite was prepared in a similar procedure for preparing Cu-BPOZ@CNB-400 by replacing DPTZ with o-Phenanthroline.

### Electrocatalytic Measurements

The preparation of catalyst ink was as follows: firstly, 5 mg of the as-obtained catalyst was added to a glass vial with 25  $\mu\text{L}$  of a 5 wt% solution of Nafion (Aldrich) and 225  $\mu\text{L}$  of isopropanol, and then ultrasonic dispersion for 30 min until a homogeneously dispersed suspension was formed. 10  $\mu\text{L}$  of catalyst ink was dropped on the surface of the glassy carbon disk (diameter: 5 mm; geometric area: 0.196  $\text{cm}^2$ ), and dried under room temperature to form a dense catalyst film with a catalyst mass loading of 1.0  $\text{mg cm}^{-2}$ .

The rotating ring disc electrode (RRDE) was used to investigate the electrochemical performance of catalysts on a CHI 760D electrochemical workstation using a standard three-electrode system in electrolyte solution with a graphite rod (diameter: 4.0 mm) as the counter electrode and an Hg/HgO electrode as the reference electrode. The cyclic voltammetry (CV) and RRDE tests were conducted in an  $\text{O}_2$ -saturated 0.1 M KOH solution at a scanning rate of 10  $\text{mV s}^{-1}$  at room temperature. The stability test of catalysts for ORR was conducted at 0.55 V (vs. RHE) in  $\text{O}_2$ -saturated 0.1 M KOH at 900 rpm by using a chronoamperometric method. The Accelerate Durability Testing (ADT) was performed at 0.6-1.0 V (vs. RHE) in  $\text{O}_2$ -saturated 0.1 M KOH at 0 rpm. The ORR polarization curves were deducted the current in Ar-saturated 0.1 M KOH solution from those in  $\text{O}_2$ -saturated 0.1 M KOH solution.

The disc current ( $I_d$ ) and ring current ( $I_r$ ) obtained by the RRDE electrode can be used to calculate the  $\text{H}_2\text{O}_2$  yield and the number of transferred electrons ( $n$ ) by the following equations:

$$\text{H}_2\text{O}_2(\%) = \frac{200 \times I_r}{I_r + N + I_d}$$

$$n = \frac{4 \times N \times I_d}{I_r + N + I_d}$$

where N is the collection coefficient, and the value is 0.26.

## Zn-air battery test

The catalyst ink was loaded on carbon fiber paper ( $1.0\text{ cm}^2$ ) and conducted as the negative electrode. Meanwhile, the zinc plate was used as the positive electrode and the mixed solution of 6 M KOH and 0.2 M  $\text{Zn}(\text{Ac})_2$  was used as the electrolyte.

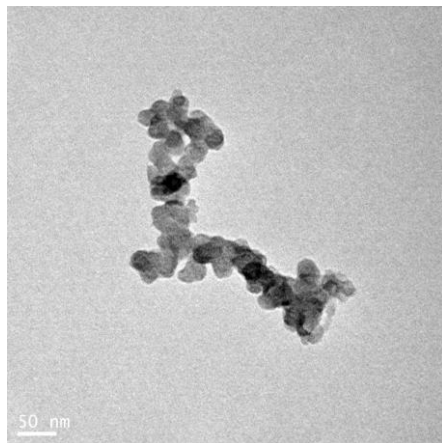

**Fig S1.** TEM image of Cu-BPOZ@CNB-400.

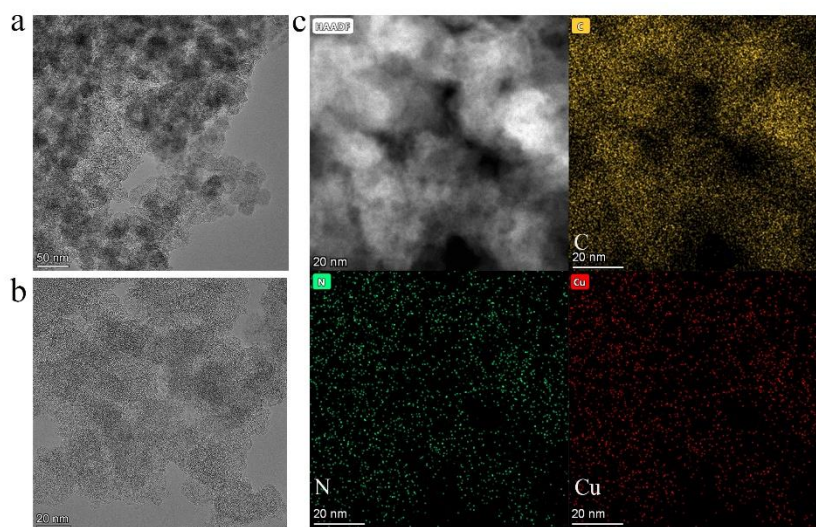

**Fig S2.** (a-b) HR-TEM images, (c) HAADF-STEM and corresponding elemental mapping images of C, N, and Cu elements in Cu-BPOZ@CNB-800.

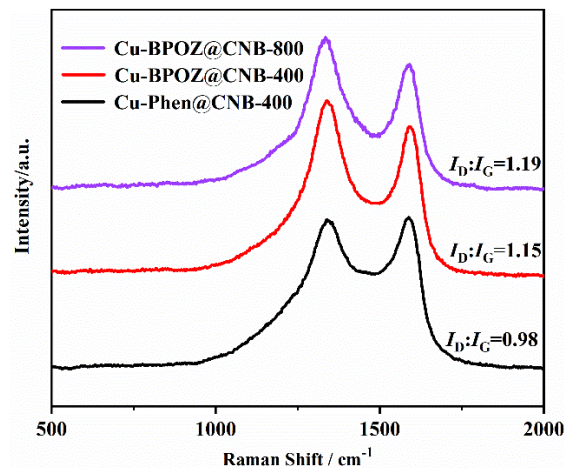

**Fig S3.** Raman spectra of Cu-BPOZ@CNB-800, Cu-BPOZ@CNB-400 and Cu-Phen@CNB-400

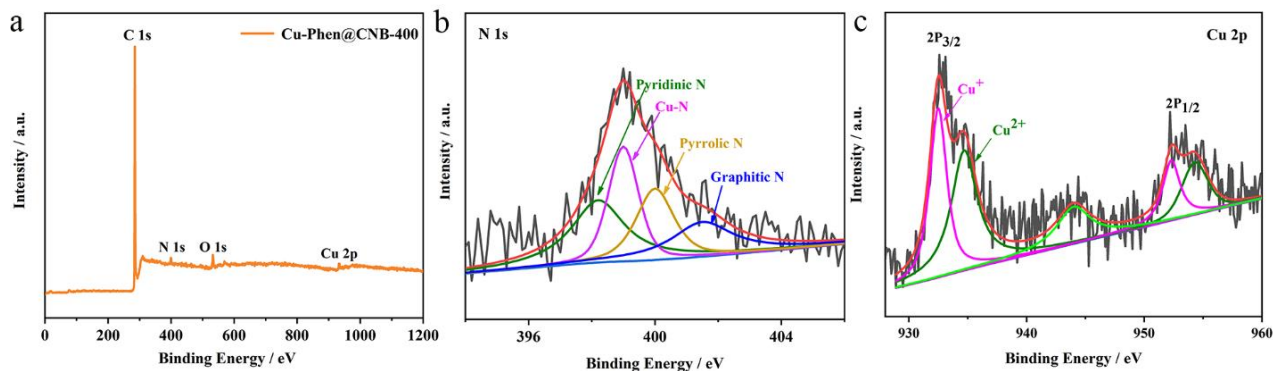

**Fig S4.** (a) XPS survey , (b) high-resolution N 1s, and (c) Cu 2p spectra of Cu-Phen@CNB-400.

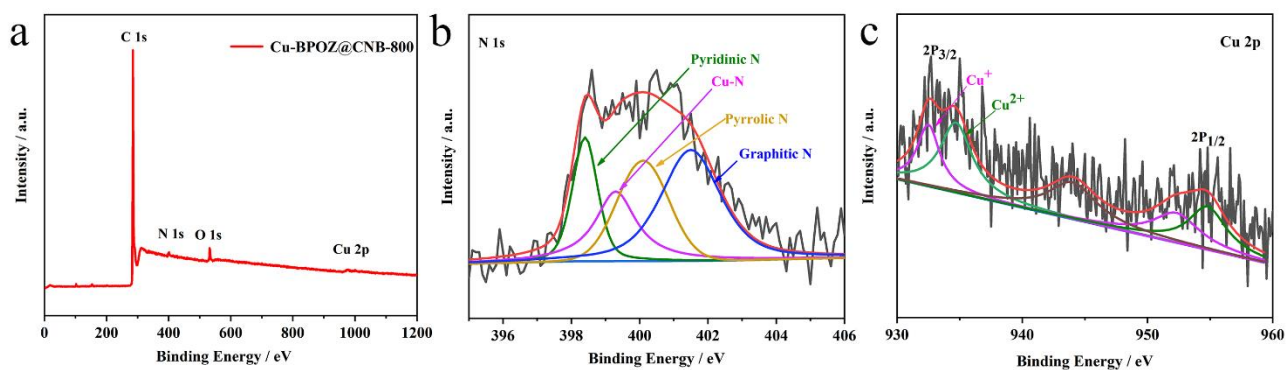

**Fig S5.** (a) XPS survey , (b) high-resolution N 1s, and (c) Cu 2p spectra of Cu-BPOZ@CNB-800.

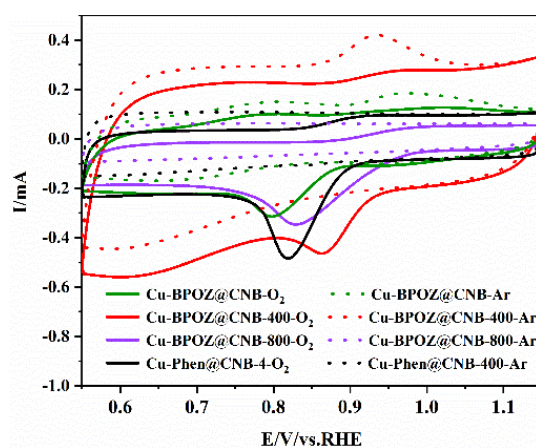

**Fig S6.** CV curves of Cu-BPOZ@CNB, Cu-BPOZ@CNB-400, Cu-BPOZ@CNB-800, and Cu-Phen@CNB-400 in an O<sub>2</sub>- and Ar-saturated 0.1 M KOH solution.

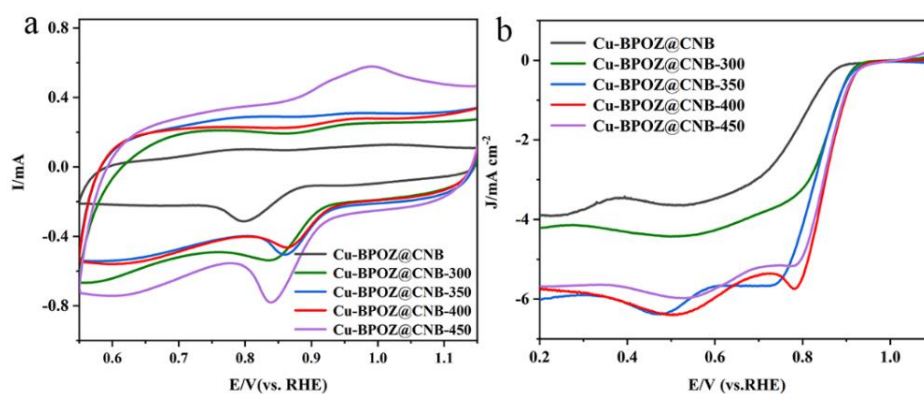

**Fig S7.** (a) CV curves and (b) LSV curves of Cu-BPOZ@CNB-T (T = 0, 300, 350, 400 and 450 °C, T represents the pyrolysis temperature.)

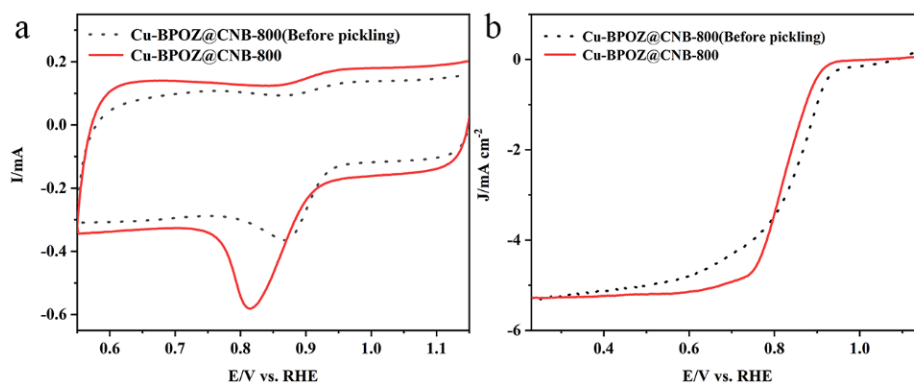

**Fig S8.** (a) CV curves and (b) LSV curves of Cu-BPOZ@CNB-800 (before acid etching) and Cu-BPOZ@CNB-800

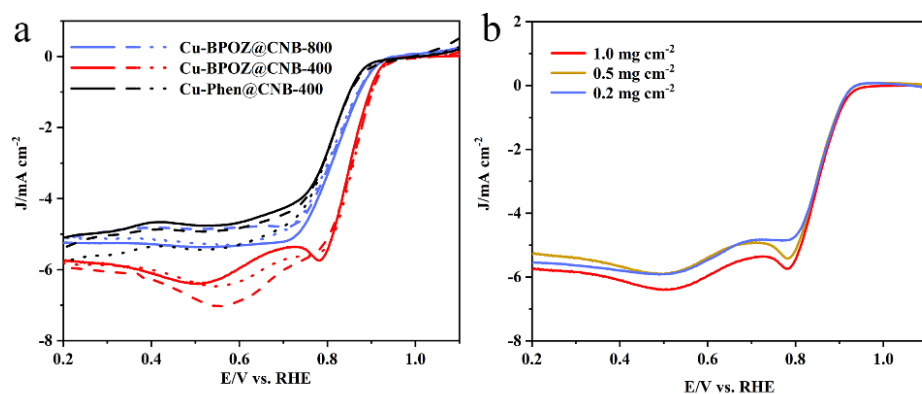

**Fig. S9.** (a) LSV curves (@ 1600 rpm) of Cu-BPOZ@CNB-800, Cu-BPOZ@CNB-400 and Cu-Phen@CNB-400 from repetition of three tests; and (b) LSV curves (@ 1600 rpm) of Cu-BPOZ@CNB-400 with the mass loading of 1.0  $\text{mg cm}^{-2}$ , 0.5  $\text{mg cm}^{-2}$  and 0.2  $\text{mg cm}^{-2}$ , respectively, in 0.1 M KOH.

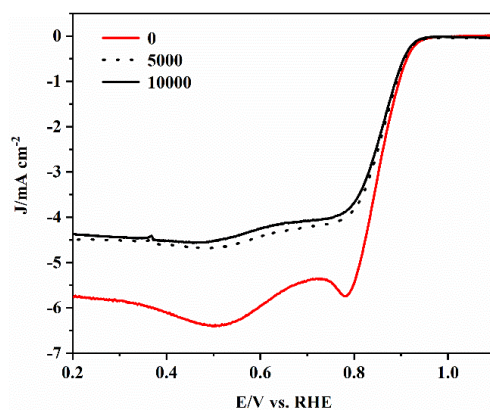

**Fig S10.** LSV curves of Cu-BPOZ@CNB-400 toward ORR after 0, 5000 and 10,000 potential cycles in  $\text{O}_2$ -saturated 0.1 M KOH.

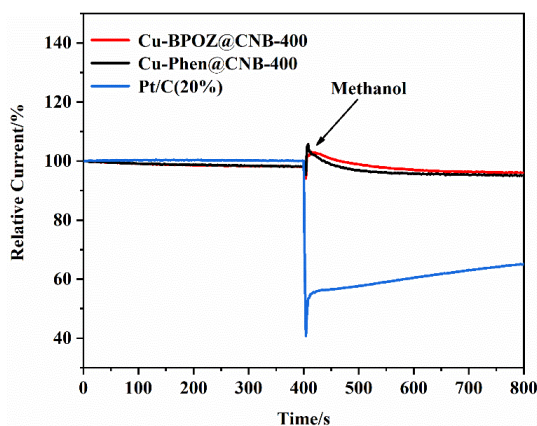

**Fig S11.** Methanol tolerance of Cu-BPOZ@CNB-400, Cu-Phen@CNB-400 and Pt/C.

**Table S1.** The content of different N types for the Cu-BPOZ@CNB-400 and Cu-BPOZ@CNB-800 calculated from XPS.

| Catalysts       | Pyridinic-N | Cu-N  | Pyrrolic-N | Graphitic-N |
|-----------------|-------------|-------|------------|-------------|
| Cu-BPOZ@CNB-400 | 16.6%       | 27.7% | 26.6%      | 29.1%       |
| Cu-BPOZ@CNB-800 | 17.1%       | 19.7% | 24.4%      | 38.8%       |

**Table S2.** Comparison of copper content of previously reported atomically dispersed copper-based catalysts.

| Catalysts                                  | Cu (wt %) | Reference        |
|--------------------------------------------|-----------|------------------|
| Cu-BPOZ@CNB-400                            | 2.3       | <b>This work</b> |
| Cu-NSDC                                    | 0.29      | S3               |
| Cu/Zn@NC                                   | 0.34      | S4               |
| CuSA/g-C <sub>3</sub> N <sub>4</sub> -1000 | 0.78      | S5               |
| Cu@NG                                      | 0.82      | S6               |

**Table S3.** The  $R_{\Omega}$  and  $R_{ct}$  for Cu-BPOZ@CNB, Cu-BPOZ@CNB-400 and Cu-BPOZ@CNB-800.

| Catalysts       | $R_{\Omega}/\Omega$ | $R_{ct}/\Omega$ |
|-----------------|---------------------|-----------------|
| Cu-BPOZ@CNB     | 86                  | 503             |
| Cu-BPOZ@CNB-400 | 85                  | 161             |
| Cu-BPOZ@CNB-800 | 80                  | 215             |

**Table S4.** Comparison of ORR performance in 0.1 M KOH at 1600 rpm of previously reported copper-based catalysts.

| Catalysts                                               | $E_{1/2}$ (V vs. RHE) | Reference        |
|---------------------------------------------------------|-----------------------|------------------|
| Cu-BPOZ@CNB-400                                         | 0.86                  | <b>This work</b> |
| Cu/Zn@NC                                                | 0.83                  | S4               |
| Cu <sub>SA</sub> /g-C <sub>3</sub> N <sub>4</sub> -1000 | 0.85                  | S5               |
| Cu@NG                                                   | 0.84                  | S6               |
| Cu/Cu <sub>2</sub> O-NC                                 | 0.8                   | S7               |
| Cu-ZrO <sub>3-x</sub> @N-BPCNFs                         | 0.856                 | S8               |
| Cu-NHC                                                  | 0.87                  | S9               |
| Cu SAC                                                  | 0.81                  | S10              |
| Cu-S <sub>1</sub> N <sub>3</sub>                        | 0.84                  | S3               |
| Cu-N/C                                                  | 0.813                 | S11              |
| Cu-N-C-ICHP NDs                                         | 0.85                  | S12              |
| Cu-N <sub>4</sub> -C                                    | 0.84                  | S13              |
| CoCu-LDH@NC                                             | 0.84                  | S14              |
| Cu@C(N4.13)                                             | 0.77                  | S15              |

**Table S5.** Electrocatalytic performance of prepared catalysts in the zinc-air cell.

| Catalysts       | $P_{\max}$ (mW cm <sup>-2</sup> ) | OCV (V) |
|-----------------|-----------------------------------|---------|
| Cu-BPOZ@CNB-400 | 127                               | 1.45    |
| Cu-Phen@CNB-400 | 105                               | 1.375   |
| Pt/C(20%)       | 122                               | 1.43    |

## References:

- S1. M. H. Elnagdi and A. W. Erian, *Arch. Pharm.*, 1991, **324**, 853-858.
- S2. J. Cui, L. Huang, Z. Lu, Y. Li, Z. Guo and H. Zheng, *CrystEngComm*, 2012, **14**, 2258-2267.
- S3. H. Zhang, Q. Sun, Q. He, Y. Zhang, X. He, T. Gan and H. Ji, *Nano Res.*, 2022, **15**, 5995-6000.
- S4. M. Tong, F. Sun, Y. Xie, Y. Wang, Y. Yang, C. Tian, L. Wang and H. Fu, *Angew. Chem. Int. Ed.*, 2021, **60**, 14005-14012.
- S5. H.-Y. Tan, S.-C. Lin, J. Wang, J.-H. Chen, C.-J. Chang, C.-H. Hou, J.-J. Shyue, T.-R. Kuo and H. M. Chen, *J. Am. Chem. Soc.*, 2023, **145**, 27054-27066.
- S6. L. Bai, C. Hou, X. Wen and J. Guan, *ACS Appl. Energy Mater.*, 2019, **2**, 4755-4762.
- S7. J. Tian, D. Liu, J. Li, D. Sun, H. Liu, H. Wang and Y. Tang, *Chin. Chem. Lett.*, 2021, **32**, 2427-2432.
- S8. Y. Qiao, Y. Zhang, S. Xia, C. Wei, Y. Chen, S. Chen and J. Yan, *Small*, 2023, **19**, 2206823.
- S9. G. Han, L. Li, X. Li, Y. Sun, C. Du, Y. Gao and G. Yin, *Carbon*, 2021, **174**, 683-692.
- S10. L. Cui, L. Cui, Z. Li, J. Zhang, H. Wang, S. Lu and Y. Xiang, *J. mater. chem. A*, 2019, **7**, 16690-16695.
- S11. Q. Lai, J. Zhu, Y. Zhao, Y. Liang, J. He and J. Chen, *Small*, 2017, **13**, 1700740.
- S12. T. Wang, R. Yang, N. Shi, J. Yang, H. Yan, J. Wang, Z. Ding, W. Huang, Q. Luo and Y. Lin, *Small*, 2019, **15**, 1902410.
- S13. W. Li, C. Min, F. Tan, Z. Li, B. Zhang, R. Si, M. Xu, W. Liu, L. Zhou and Q. Wei, *ACS nano*, 2019, **13**, 3177-3187.
- S14. L. Li, D. Jiang, S. Cai, S. Li and Y. Wang, *ACS Appl. Energy Mater.*, 2024.
- S15. X. Cao, W. Miao, M. Qin, E. Lv, H. Yu, X. Zhang and X. Dong, *J. Alloys Compd.*, 2023, **948**, 169739.
